# Supplementary material for: White matter variability, cognition, and disorders: a systematic review
Source: Springer Nature journal article supplement (doi:10.1007/s00429-021-02382-w), 2021-11-03
Supplement: MOESM1 [file 19826730]

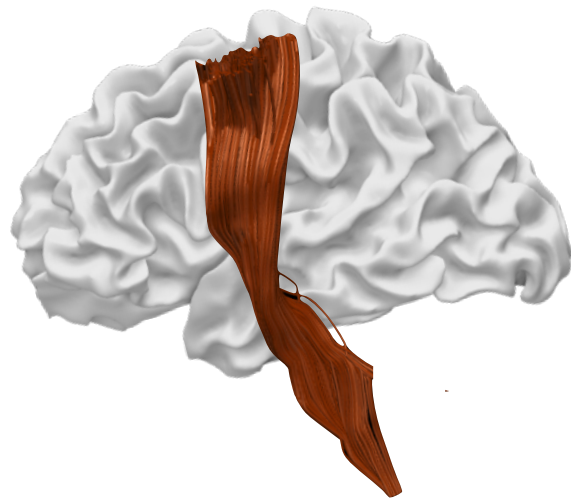

corticospinal tract

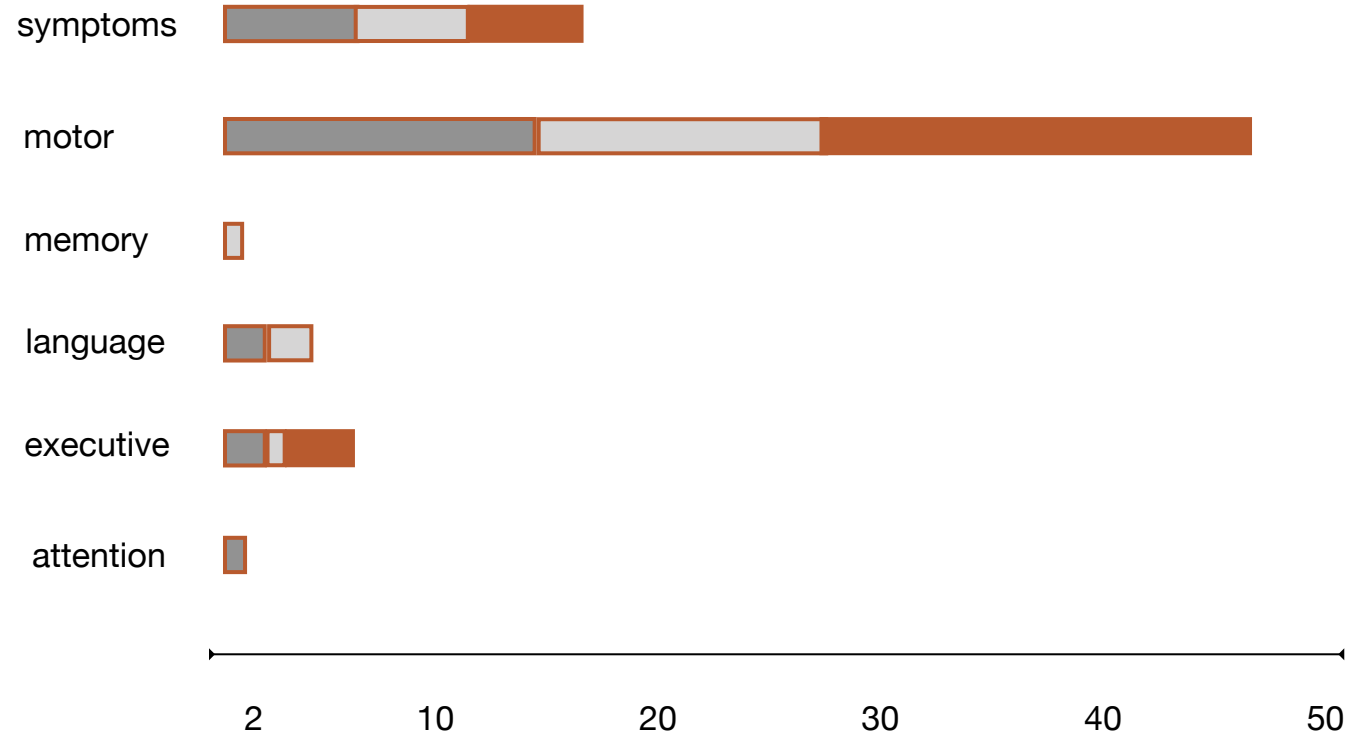

■ Left hemisphere   ■ Right hemisphere   □ Unspecified

number of correlations

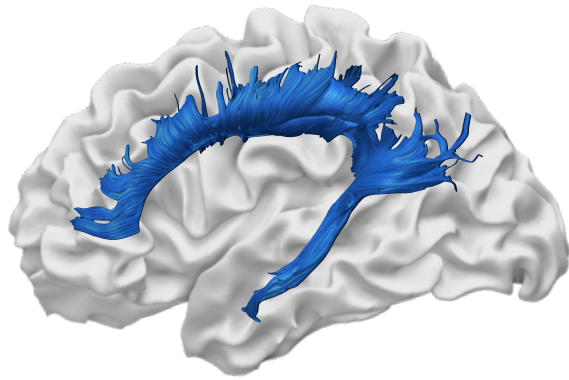

cingulum

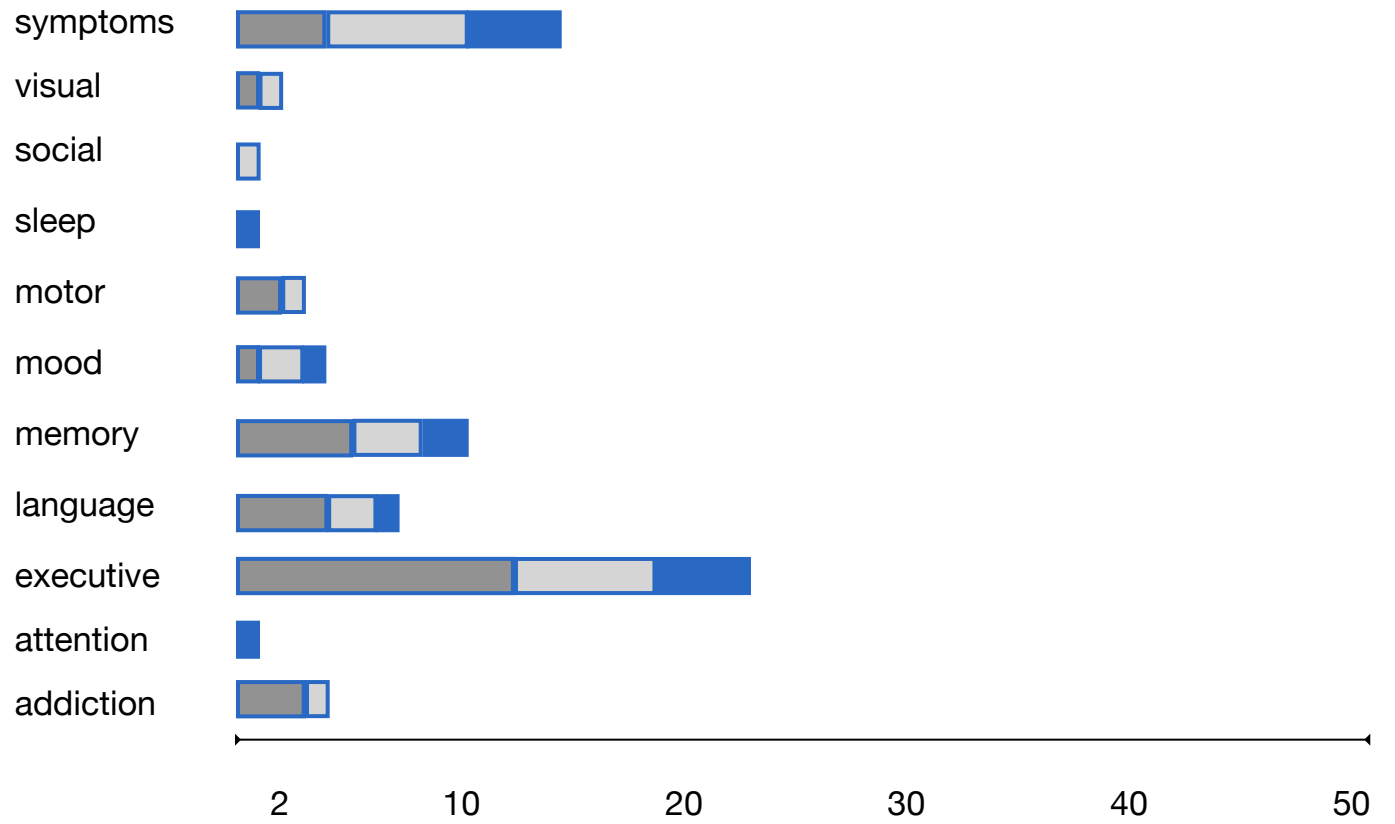

Left hemisphere Right hemisphere Unspecified

number of correlations

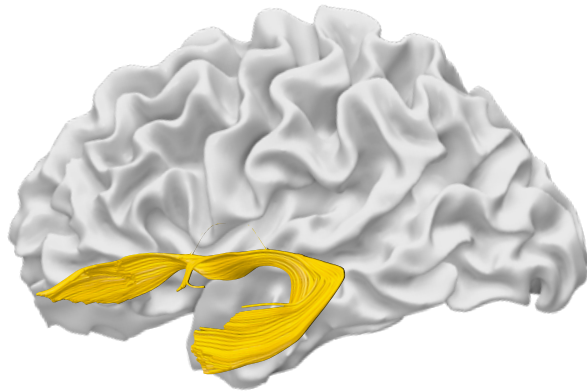

uncinate fasciculus

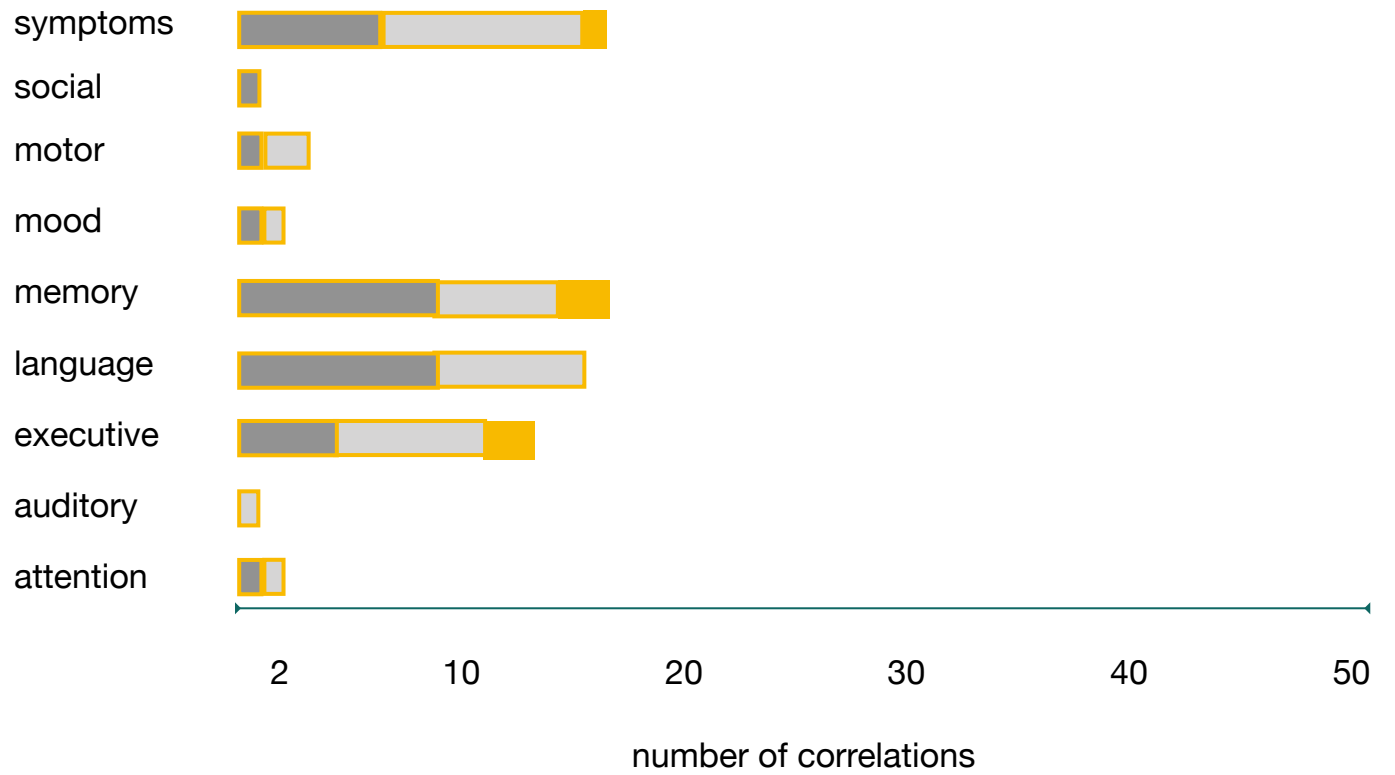

Left hemisphere Right hemisphere Unspecified

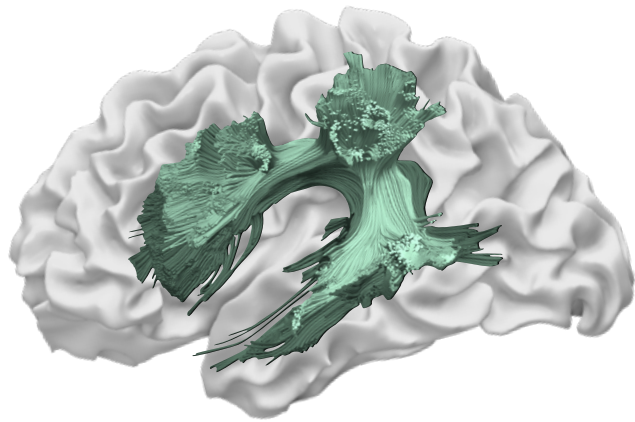

arcuate fasciculus

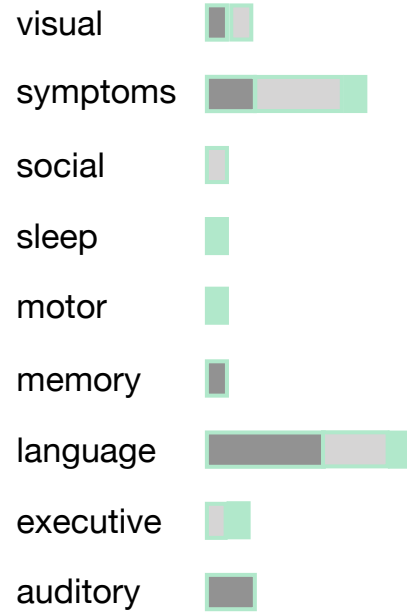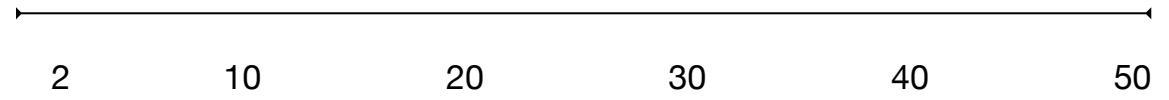

number of correlations

■ Left hemisphere   ■ Right hemisphere   □ Unspecified

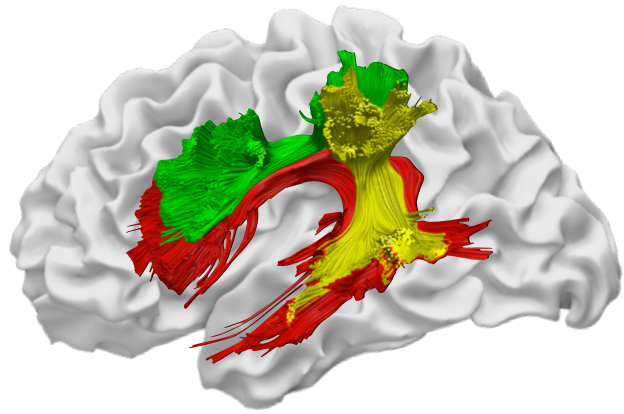

arcuate fasciculus, three segments

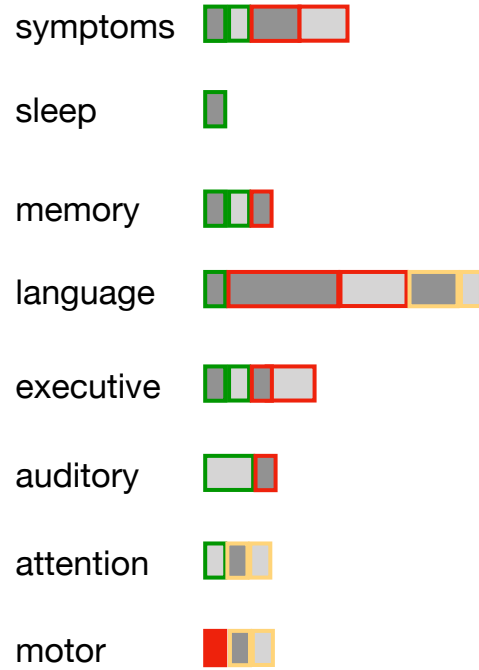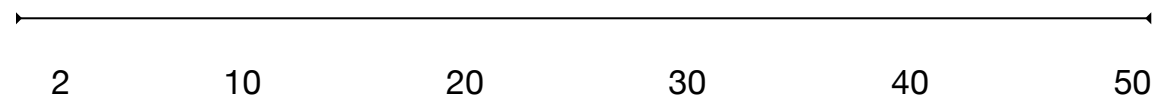

number of correlations

Left hemisphere
  Right hemisphere
  Unspecified

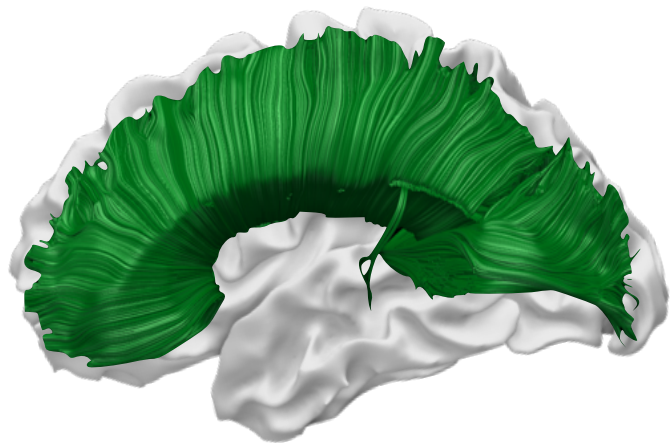

corpus callosum

- visual
- symptoms
- motor
- mood
- memory
- language
- executive
- auditory
- addiction

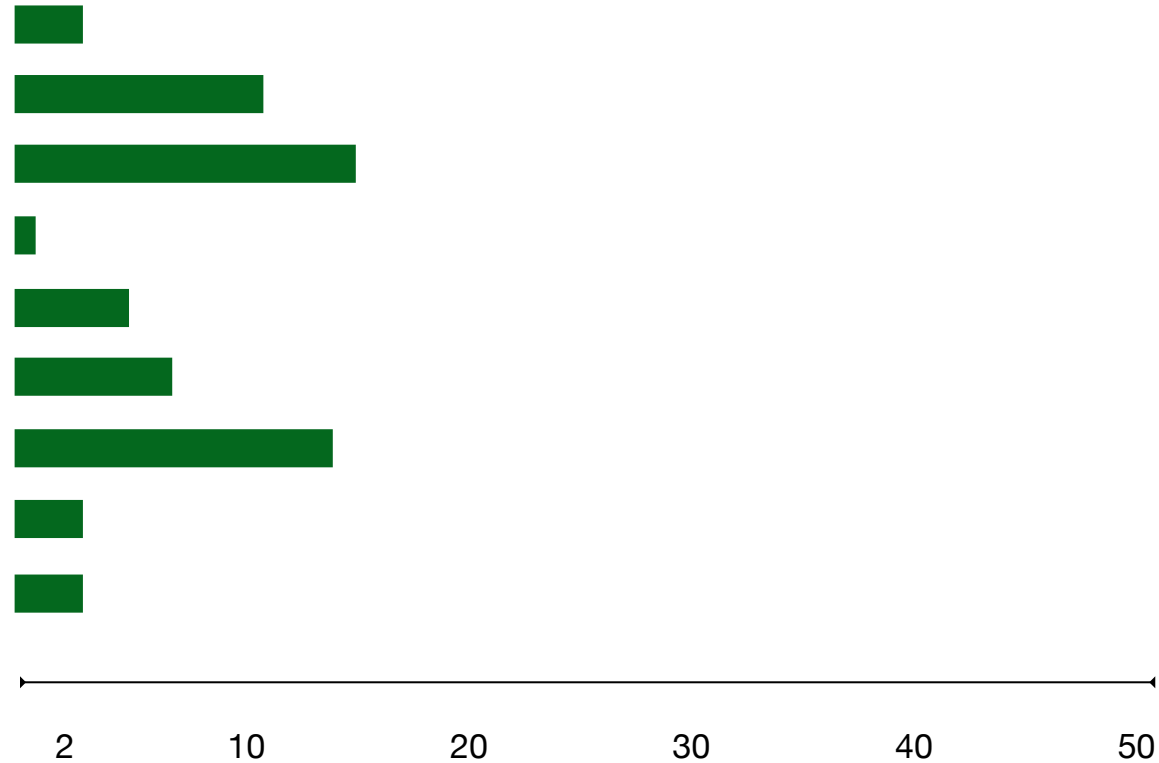

number of correlations

Left hemisphere    Right hemisphere    Unspecified

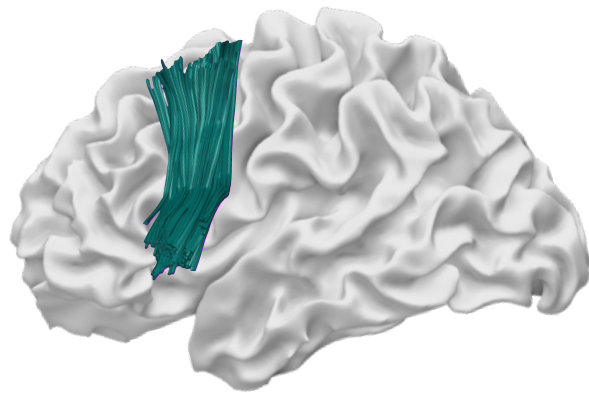

frontal aslant tract

motor

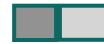

language

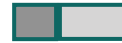

executive

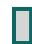

attention

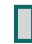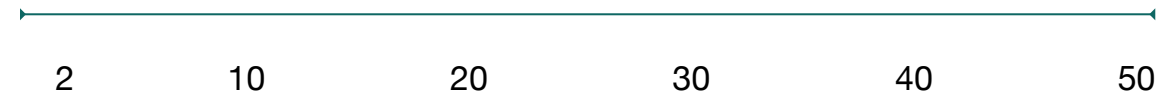

number of correlations

Left hemisphere Right hemisphere Unspecified

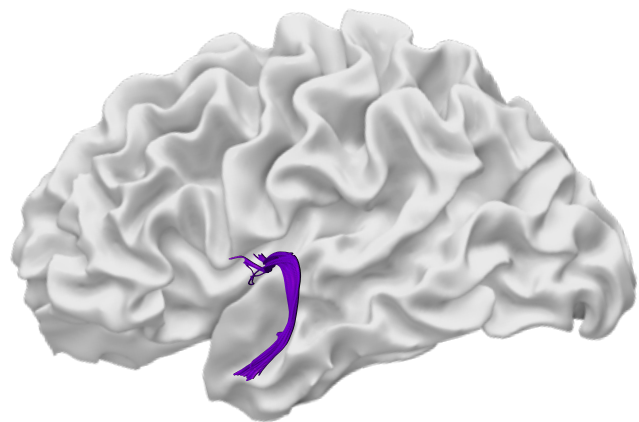

anterior commissure

symptoms 

reward 

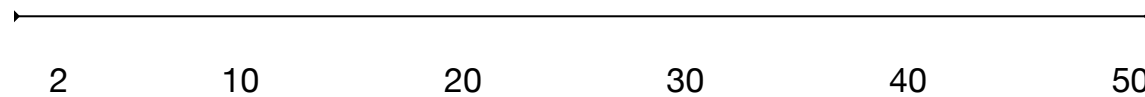

number of correlations

 Left hemisphere  Right hemisphere  Unspecified



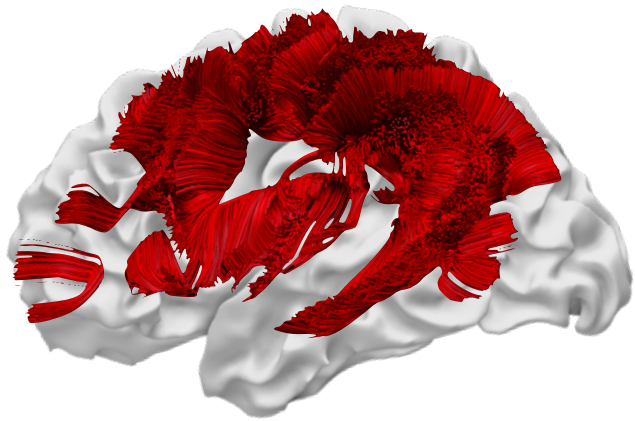

U-shaped fibres

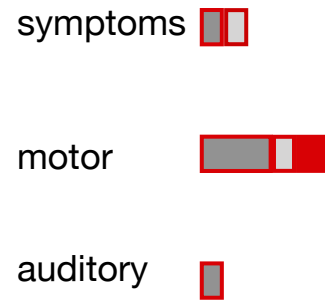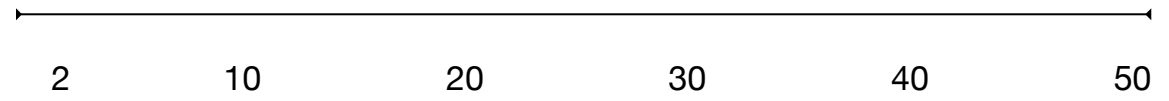

number of correlations

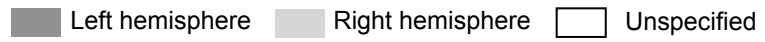

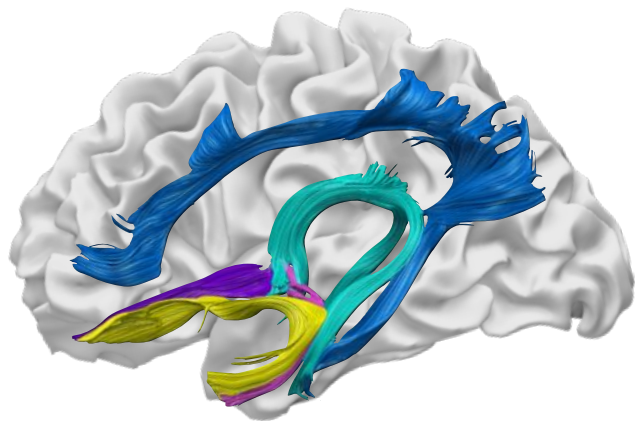

- cingulum
- fornix
- accumbodfrontal fasciculus
- anterior commissure
- uncinate fasciculus
- limbic combined

- Left hemisphere
- Right hemisphere
- Unspecified

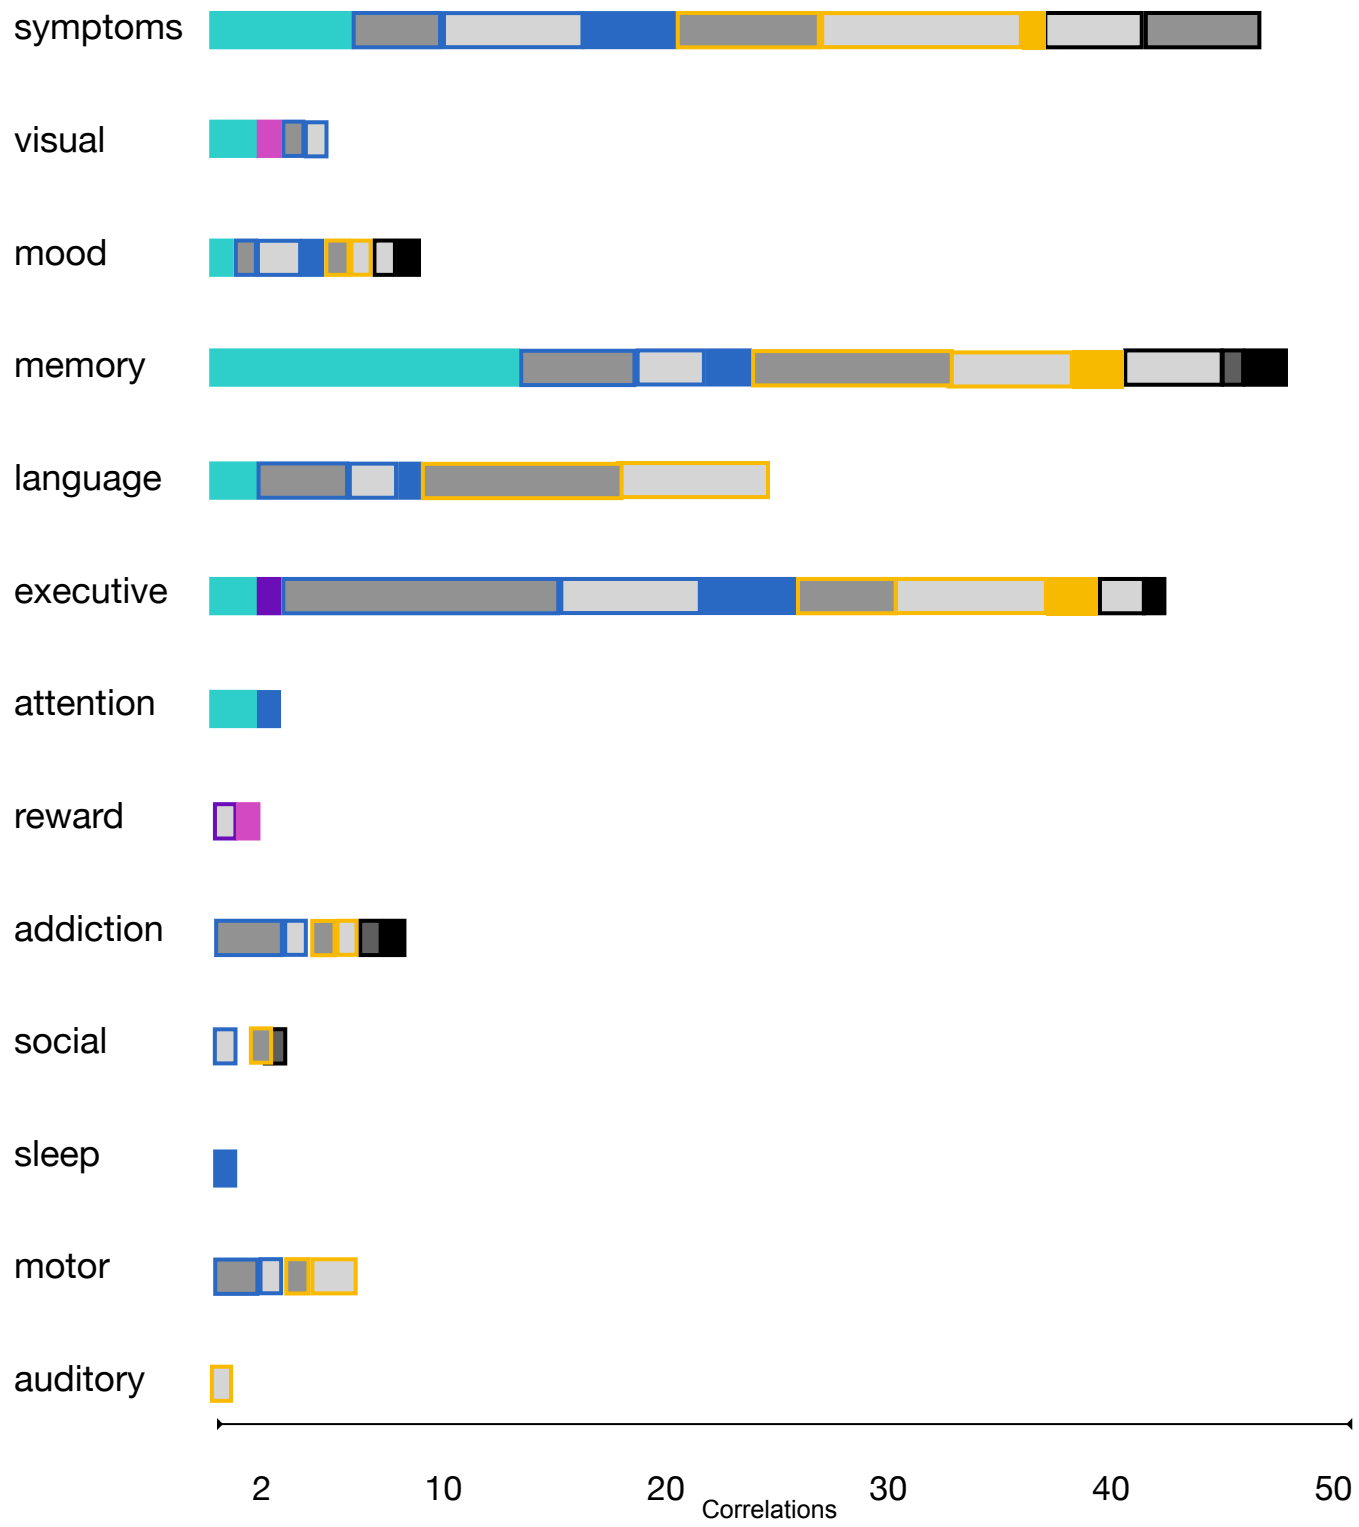

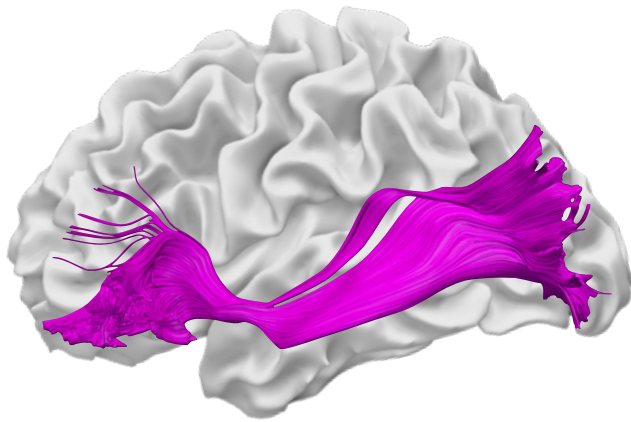

inferior fronto-occipital fasciculus

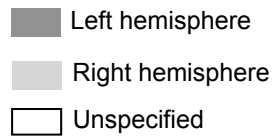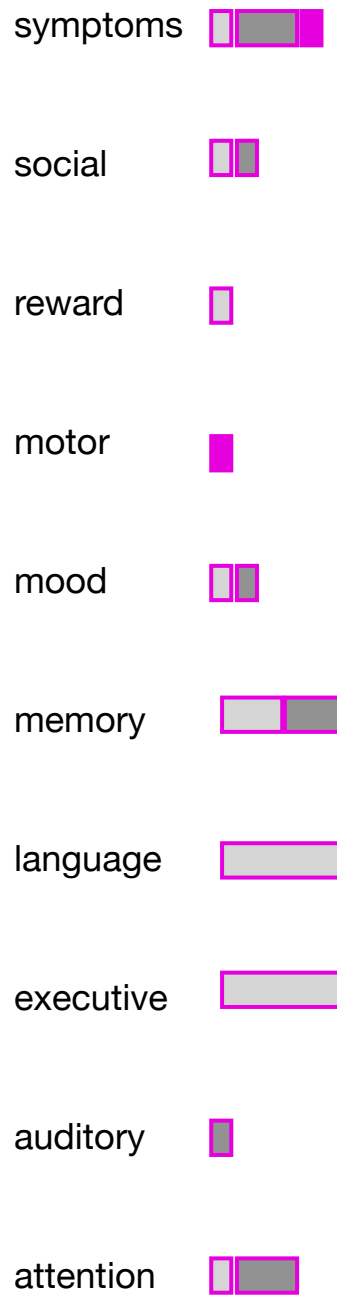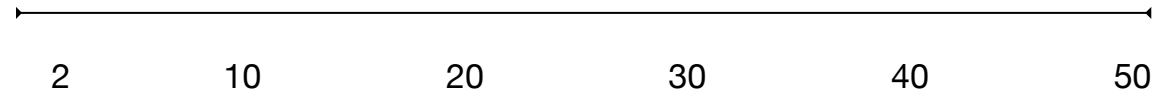

number of correlations

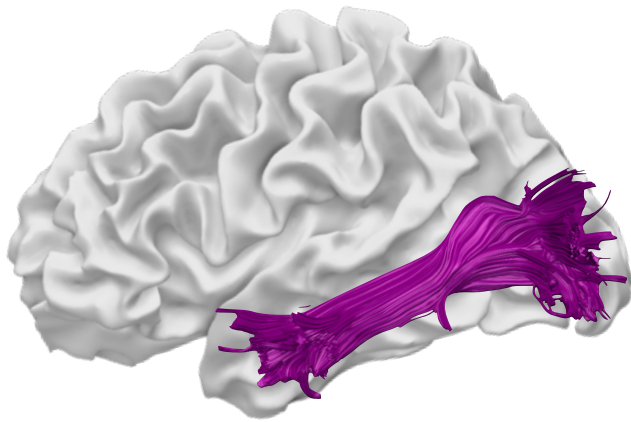

inferior longitudinal fasciculus

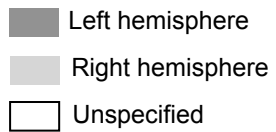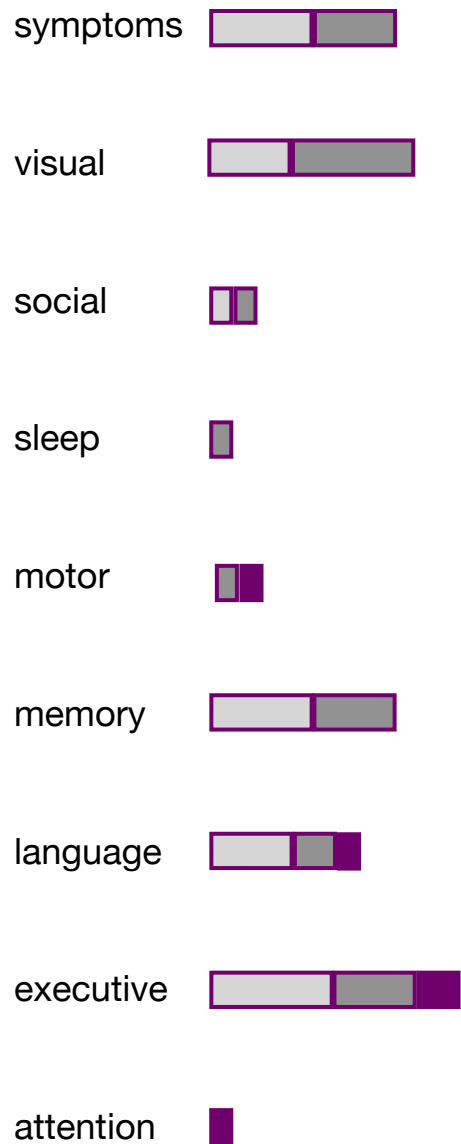

number of correlations

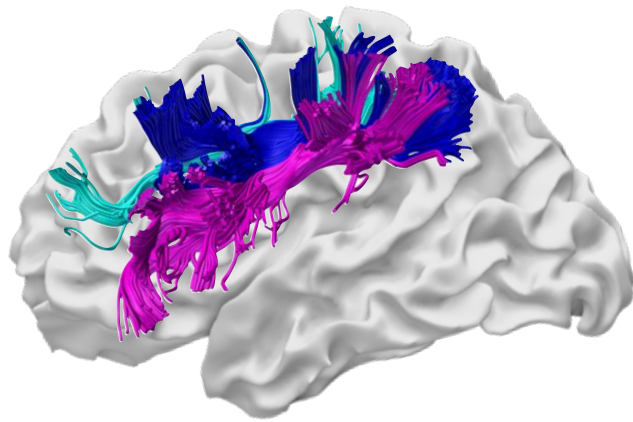

superior longitudinal fasciculus I  
 superior longitudinal fasciculus II  
 superior longitudinal fasciculus III  
 SLFs unspecified

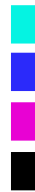

symptoms

sleep

motor

language

attention

memory

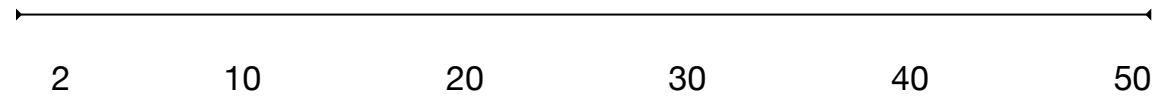

number of correlations

Left hemisphere  
 Right hemisphere  
 Unspecified

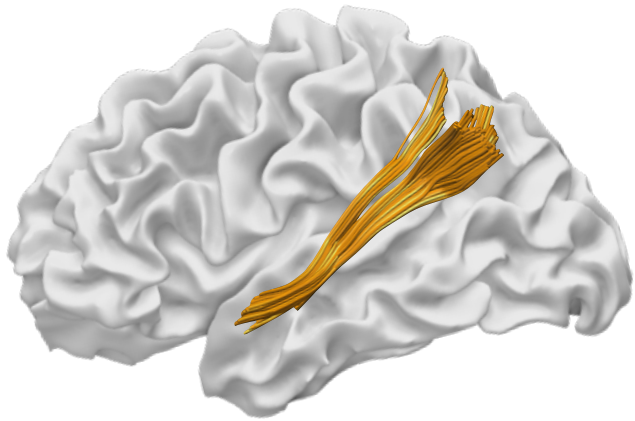

middle longitudinal fasciculus

symptoms 

visual 

language 

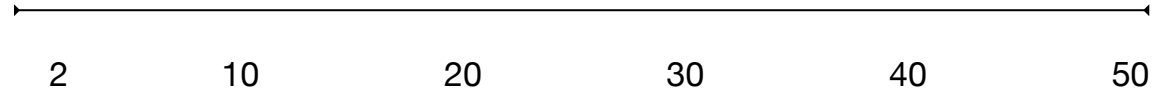

number of correlations

-  Left hemisphere
-  Right hemisphere
-  Unspecified

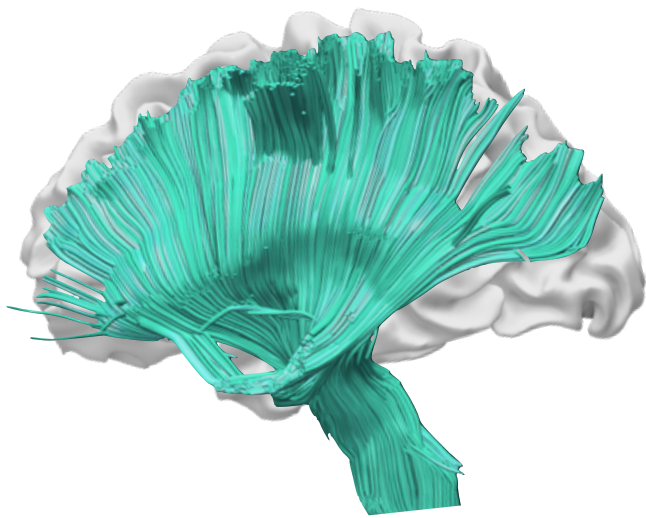

projections

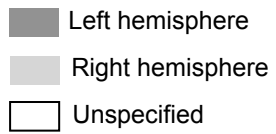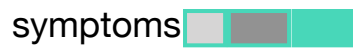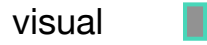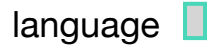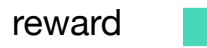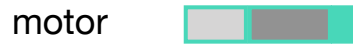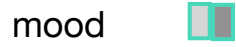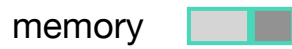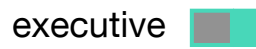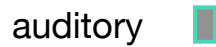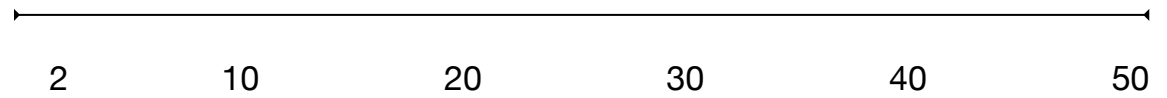

number of correlations

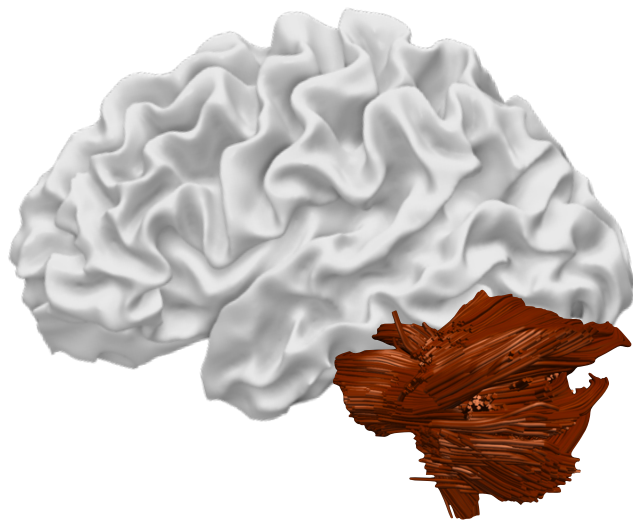

cerebellar/brainstem fibres

symptoms

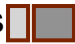

social

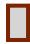

motor

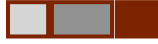

executive

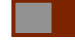

auditory

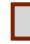

attention

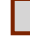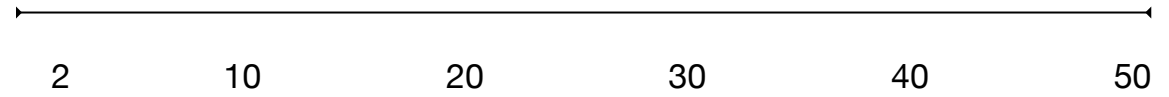

Left hemisphere Right hemisphere Unspecified

number of correlations



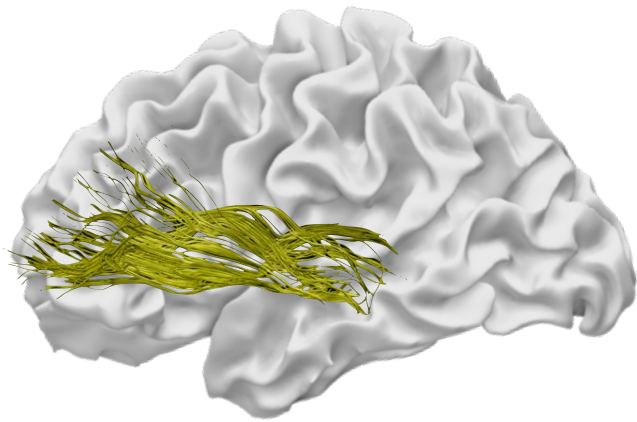

anterior thalamic projections

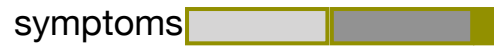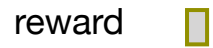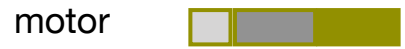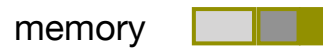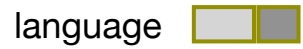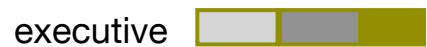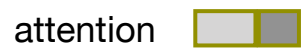

- Left hemisphere
- Right hemisphere
- Unspecified

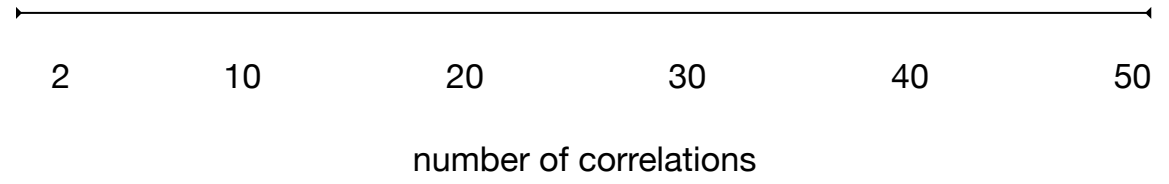

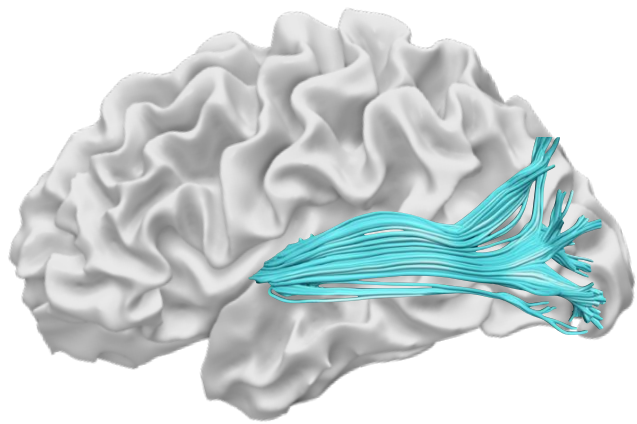

visual

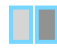

language

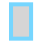

optic fibres

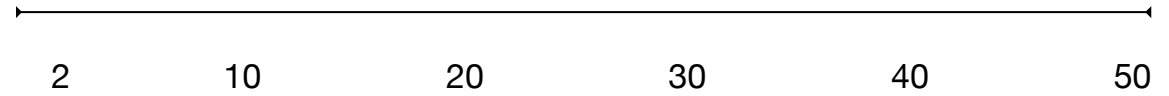

Left hemisphere    Right hemisphere    Unspecified

number of correlations

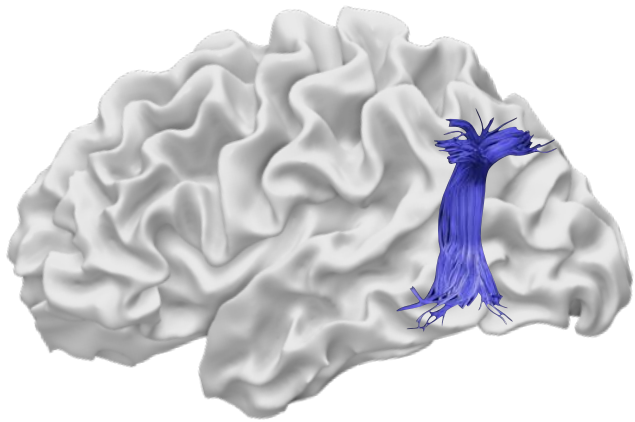

visual

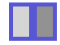

motor

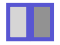

vertical occipital fasciculus

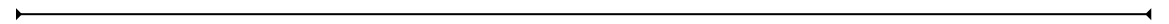

2

10

20

30

40

50

Left hemisphere Right hemisphere Unspecified

number of correlations
